# Supplementary material
Source: PubMed Central journal article supplement (PMC3752912)
Supplement: NIHMS486860-supplement-1_si_001.pdf [file NIHMS486860-supplement-1_si_001.pdf]

Supporting Information

For

**Matching of additive and polarizable force fields for multiscale  
condensed phase simulations**

*Christopher M. Baker and Robert B. Best*

## Supporting Methods

We illustrate here how the derivatives in Equation 3 may be obtained by simple evaluations of the electrostatic energy with appropriately chosen charges. Consider charge parameter  $q_r$ . We divide the system into 3 groups – group A is the set of atoms having charge  $q_r$ , set C is a set of atoms having charge  $q_N$ , where  $q_N$  enforces the constraint of charge neutrality, being defined in such a way as to neutralize the overall charge, and set B are all the remaining atoms. The derivative of the potential with respect to  $q_r$  is given by:

$$\frac{\partial U}{\partial q_r} = 2 \sum_{\substack{i \in A \\ j \in A}} \frac{q_r}{r_{ij}} + \sum_{\substack{i \in A \\ j \in B}} \frac{q_j}{r_{ij}} + \sum_{\substack{i \in A \\ j \in C}} \frac{q_N - q_r}{r_{ij}} + \sum_{\substack{i \in B \\ j \in B}} 0 - \sum_{\substack{i \in B \\ j \in C}} \frac{q_j}{r_{ij}} - 2 \sum_{\substack{i \in C \\ j \in C}} \frac{q_N}{r_{ij}}$$

We define the following sets of charges and corresponding energies: in set  $\alpha$ , atoms in group A have charge 1, atoms in group B have their normal charge, and atoms in group C have a charge of  $q_N + q_r - 1$ . In set  $\beta$ , atoms in group A have charge 1, in B charge 0, and in group C charge -1. In set  $\gamma$ , atoms in group A have charge 0, in group B their normal charge and in group C charge  $q_N + q_r$ . Note that all these groups are overall electrostatically neutral and so their energy can be evaluated without complications using the tools in standard MD codes. The energies of each group are given by:

$$U_\alpha = \sum_{\substack{i \in A \\ j \in A}} \frac{1}{r_{ij}} + \sum_{\substack{i \in A \\ j \in B}} \frac{q_j}{r_{ij}} + \sum_{\substack{i \in A \\ j \in C}} \frac{q_N + q_r - 1}{r_{ij}} + \sum_{\substack{i \in B \\ j \in B}} \frac{q_i q_j}{r_{ij}} + \sum_{\substack{i \in B \\ j \in C}} \frac{q_j (q_N + q_r - 1)}{r_{ij}} + \sum_{\substack{i \in C \\ j \in C}} \frac{(q_N + q_r - 1)^2}{r_{ij}}$$

$$U_\beta = \sum_{\substack{i \in A \\ j \in A}} \frac{1}{r_{ij}} + \sum_{\substack{i \in A \\ j \in B}} 0 - \sum_{\substack{i \in A \\ j \in C}} \frac{1}{r_{ij}} + \sum_{\substack{i \in B \\ j \in B}} 0 + \sum_{\substack{i \in B \\ j \in C}} 0 + \sum_{\substack{i \in C \\ j \in C}} \frac{1}{r_{ij}}$$

$$U_\gamma = \sum_{\substack{i \in A \\ j \in A}} 0 + \sum_{\substack{i \in A \\ j \in B}} 0 + \sum_{\substack{i \in A \\ j \in C}} 0 + \sum_{\substack{i \in B \\ j \in B}} \frac{q_i q_j}{r_{ij}} + \sum_{\substack{i \in B \\ j \in C}} \frac{q_j (q_N + q_r)}{r_{ij}} + \sum_{\substack{i \in C \\ j \in C}} \frac{(q_N + q_r)^2}{r_{ij}}$$

With the above definitions, we have:

$$\frac{\partial U}{\partial q_r} = U_\alpha + (2q_r - 1)U_\beta - U_\gamma$$

A similar approach may be taken to the second derivatives.

## Supporting Figures

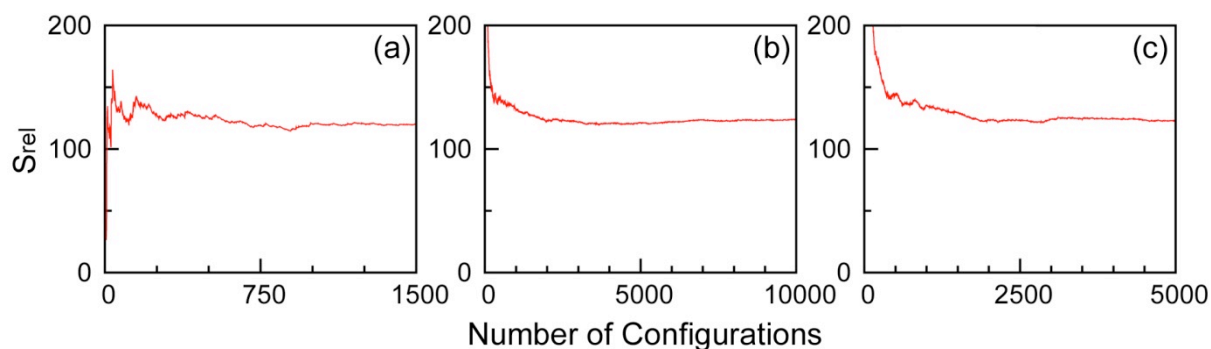

**Figure S1.** Measuring the number of configurations that must be included to achieve a converged value of  $S_{rel}$  for (a) water, (b) acetamide and (c) cyclohexane.  $S_{rel}$  is calculated using Equation 6.

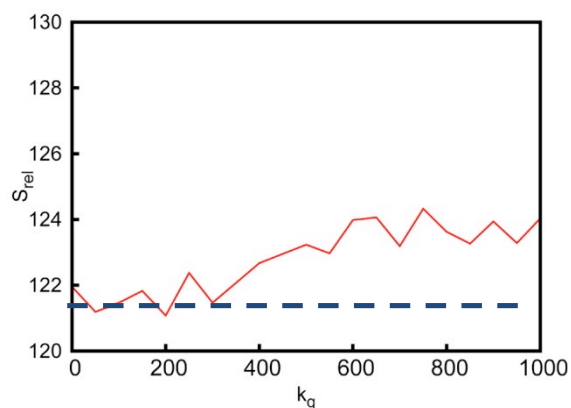

**Figure S2.** The final value of  $S_{rel}$  for acetamide, obtained from the optimization of  $S_{rel}'$  (Equation 9) as function of the restraint force constant  $k_q$ . At each value of  $k_q$ ,  $S_{rel}'$  was optimized using the Monte Carlo Simulated Annealing protocol. Dashed line indicates optimal range of  $S_{rel}$ .

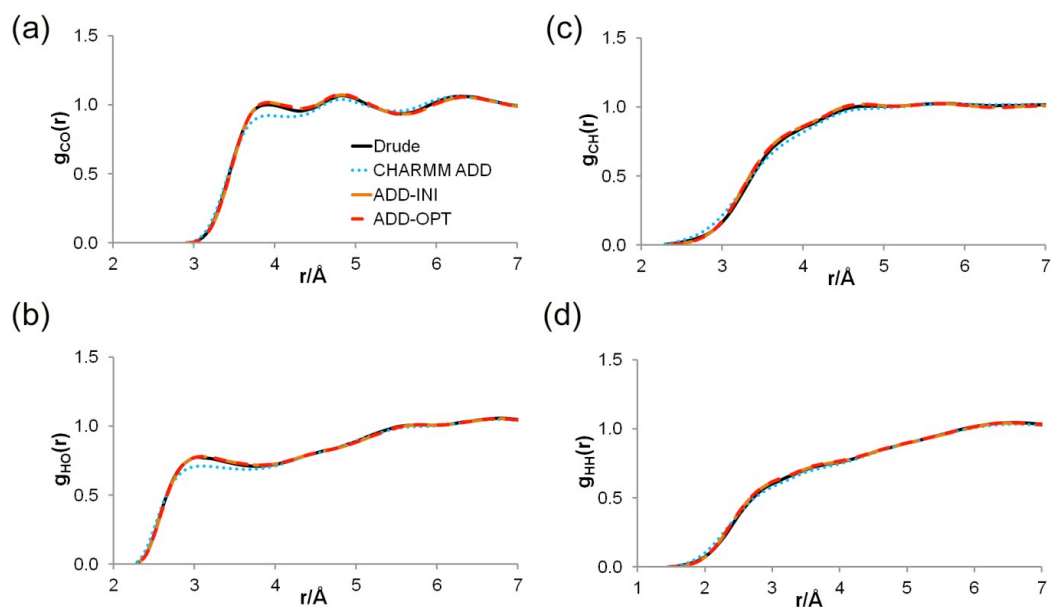

**Figure S3.** Radial distribution functions obtained from simulations of cyclohexane in water, calculated using various force fields. Radial distribution functions are described as  $g_{ab}(r)$ , where a represents the cyclohexane atom type, and b represents the water atom type.

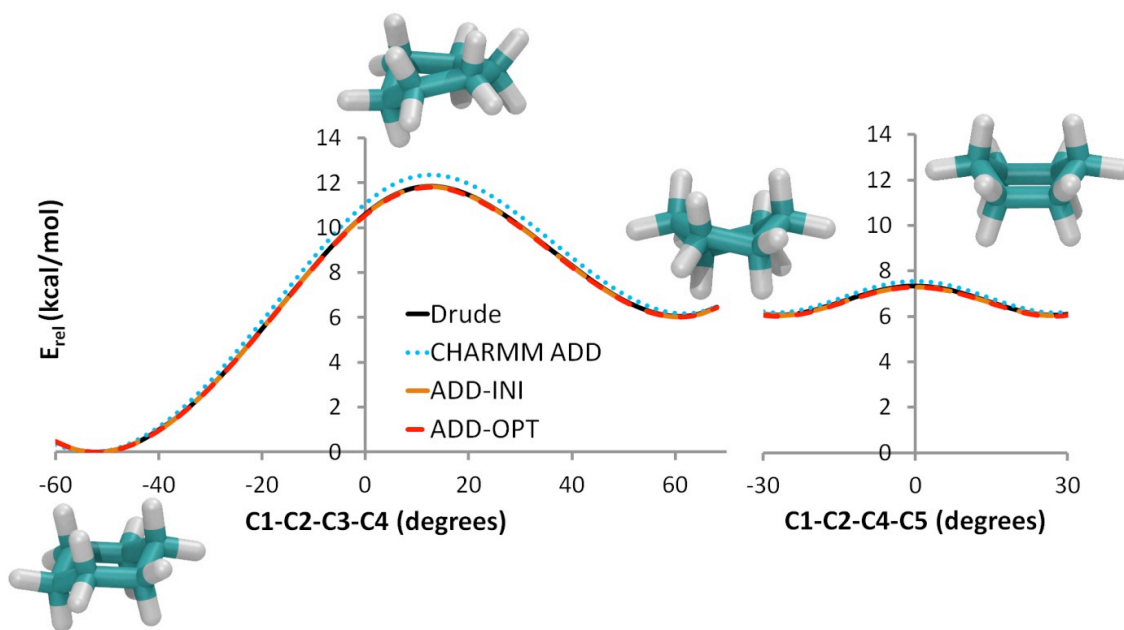

**Figure S4.** Dihedral angle potential energy surfaces for cyclohexane. Atom naming is as shown in Figure 1, and all energies are calculated relative to the cyclohexane chair conformation, the global energy minimum. The C1-C2-C3-C4 dihedral measures the interconversion between the chair and twist-boat conformations, via the “half-chair” transition state. The C1-C2-C4-C5 dihedral measures the interconversion between two twist-boat conformations, via the boat transition state.

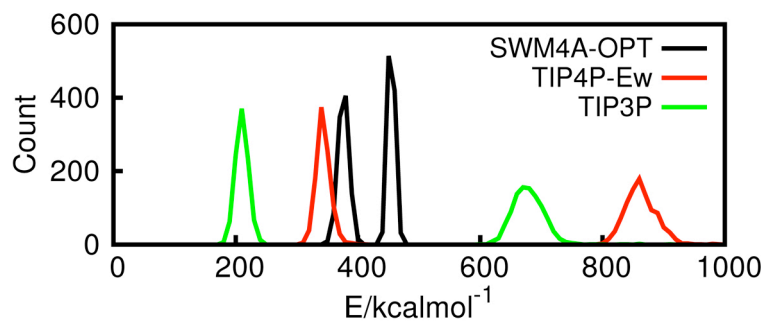

**Figure S5.** Overlap of energy difference distributions between the Drude SWM4-NDP model and various additive models, calculated as described for Equation 7 from simulations of liquid water. Matching colors are used to compare overlap between distributions from the simulation with SWM4-NDP model and the model noted in the key; for each pair of simulations, the distributions representing  $\Delta_i$ , and  $\Delta_j$  (Equation 7) are shown by lines with the same colour.

## Supporting Tables

### *Force Field Parameters*

| Atom Type 1 | Atom Type 2 | $K_b$  | $b_0$      |
|-------------|-------------|--------|------------|
| Water       |             |        |            |
| HT          | HT          | 0.0    | 1.5139     |
| HT          | OT          | 450.0  | 0.9572     |
| OT          | LP          | 0.0    | 0.24034492 |
| Acetamide   |             |        |            |
| CD2O1A      | CD33A       | 305.00 | 1.517      |
| CD33A       | HDA3A       | 322.00 | 1.111      |
| OD2C1A      | CD2O1A      | 623.00 | 1.239      |
| ND2A1       | CD2O1A      | 420.00 | 1.350      |
| ND2A1       | HDP1A       | 480.00 | 1.025      |
| Cyclohexane |             |        |            |
| CD32A       | HDA2A       | 309.00 | 1.111      |
| CD32A       | CD32A       | 222.50 | 1.530      |

**Table S1.** Bond stretching parameters used with the SWM4A-INI/SWM4A-OPT and ADD-INI/ADD-OPT models.  $K_b$  in kcal/mol/Å<sup>2</sup> and  $b_0$  in Å. Atom types are taken directly from the CHARMM Drude polarizable force field, as described in Refs 1-3.

| Atom Type 1 | Atom Type 2 | Atom Type 3 | $K_\theta$ | $\theta_0$ | $K_{ub}$ | $S_0$ |
|-------------|-------------|-------------|------------|------------|----------|-------|
| Water       |             |             |            |            |          |       |
| HT          | OT          | HT          | 55.00      | 104.52     |          |       |
| Acetamide   |             |             |            |            |          |       |
| CD2O1A      | ND2A1       | HDP1A       | 50.00      | 123.50     |          |       |
| ND2A1       | CD2O1A      | CD33A       | 40.00      | 114.50     |          |       |
| ND2A1       | CD2O1A      | OD2C1A      | 85.00      | 125.00     |          |       |
| HDP1A       | ND2A1       | HDP1A       | 24.00      | 113.00     |          |       |
| CD2O1A      | CD33A       | HDA3A       | 42.50      | 111.30     |          |       |
| OD2C1A      | CD2O1A      | CD33A       | 73.00      | 121.00     |          |       |
| HDA3A       | CD33A       | HDA3A       | 35.50      | 108.40     | 5.40     | 1.802 |
| Cyclohexane |             |             |            |            |          |       |
| HDA2A       | CD32A       | CD32A       | 26.50      | 110.10     | 22.53    | 2.179 |
| HDA2A       | CD32A       | HDA2A       | 35.50      | 109.00     | 5.40     | 1.802 |
| CD32A       | CD32A       | CD32A       | 58.35      | 113.60     | 11.16    | 2.561 |

**Table S2.** Angle bending parameters used with the SWM4A-INI/SWM4A-OPT and ADD-INI/ADD-OPT models.  $K_\theta$  in kcal/mol/rad<sup>2</sup>,  $\theta_0$  in degrees,  $K_{ub}$  in kcal/mol/Å<sup>2</sup> and  $S_0$  in Å. Atom types are taken directly from the CHARMM Drude polarizable force field, as described in Refs 1-3.

| Atom Type 1 | Atom Type 2 | Atom Type 3 | Atom Type 4 | $K_\chi$ | n | $\delta$ |
|-------------|-------------|-------------|-------------|----------|---|----------|
| Acetamide   |             |             |             |          |   |          |
| HDP1A       | ND2A1       | CD2O1A      | OD2C1A      | 2.000    | 2 | 180.00   |
| HDP1A       | ND2A1       | CD2O1A      | CD33A       | 2.000    | 2 | 180.00   |
| ND2A1       | CD2O1A      | CD33A       | HDA3A       | 0.070    | 3 | 180.00   |
| OD2C1A      | CD2O1A      | CD33A       | HDA3A       | 0.000    | 3 | 180.00   |
| Cyclohexane |             |             |             |          |   |          |
| CD32A       | CD32A       | CD32A       | CD32A       | 0.136    | 5 | 0.00     |
| CD32A       | CD32A       | CD32A       | CD32A       | 0.078    | 4 | 0.00     |
| CD32A       | CD32A       | CD32A       | CD32A       | 0.139    | 3 | 180.00   |
| CD32A       | CD32A       | CD32A       | CD32A       | 0.083    | 2 | 0.00     |
| CD32A       | CD32A       | CD32A       | HDA2A       | 0.190    | 3 | 0.00     |
| HDA2A       | CD32A       | CD32A       | HDA2A       | 0.190    | 3 | 0.00     |

**Table S3.** Dihedral angle parameters used with the SWM4A-INI/SWM4A-OPT and ADD-INI/ADD-OPT models.  $K_\chi$  in kcal/mol and  $\delta$  in degrees. Atom types are taken directly from the CHARMM Drude polarizable force field, as described in Refs 1-3.



| Atom Type 1 | Atom Type 2 | Atom Type 3 | Atom Type 4 | $K_\psi$ | $\psi_0$ |
|-------------|-------------|-------------|-------------|----------|----------|
| Acetamide   |             |             |             |          |          |
| OD2C1A      | ND2A1       | CD33A       | CD2O1A      | 90.0     | 0.00     |
| ND2A1       | HDP1A       | HDP1A       | CD2O1A      | 4.0      | 0.00     |

**Table S4.** Improper dihedral parameters used with the SWM4A-INI/SWM4A-OPT and ADD-INI/ADD-OPT models.  $K_\psi$  in kcal/mol/rad<sup>2</sup> and  $\psi_0$  in degrees. Atom types are taken directly from the CHARMM Drude polarizable force field, as described in Refs 1-3.

| Atom Type   | $\epsilon$  | $R_{\min}/2$ | $\epsilon_{,1-4}$ | $R_{\min}/2_{,1-4}$ |
|-------------|-------------|--------------|-------------------|---------------------|
| Water       |             |              |                   |                     |
| OT          | -0.21094325 | 1.78692899   |                   |                     |
| HT          | -0.0000     | 0.0000       |                   |                     |
| LP          | -0.0000     | 0.0000       |                   |                     |
| Acetamide   |             |              |                   |                     |
| HDA3A       | -0.0240     | 1.3400       |                   |                     |
| HDP1A       | -0.0100     | 0.4000       |                   |                     |
| CD33A       | -0.0780     | 2.0400       | -0.0100           | 1.9000              |
| CD2O1A      | -0.2300     | 1.8000       |                   |                     |
| OD2C1A      | -0.0950     | 1.9000       |                   |                     |
| ND2A1       | -0.2700     | 1.9100       |                   |                     |
| Cyclohexane |             |              |                   |                     |
| HDA2A       | -0.0350     | 1.3400       |                   |                     |
| CD32A       | -0.0560     | 2.0100       | -0.0100           | 1.9000              |

**Table S5.** Lennard-Jones parameters used with the SWM4A-INI/SWM4A-OPT and ADD-INI/ADD-OPT models.  $\epsilon$  and  $\epsilon_{,1-4}$  in kcal/mol;  $R_{\min}/2$  and  $R_{\min}/2_{,1-4}$  in Å. Atom types are taken directly from the CHARMM Drude polarizable force field, as described in Refs 1-3.

## Force Field Charge Variation

| Atom | $S_{rel}$ | Amber ff03 | Selected force fields |
|------|-----------|------------|-----------------------|
| C    | 0.0836    | 0.0844     | 0.0638                |
| O    | 0.0736    | 0.0481     | 0.0638                |
| N    | 0.0696    | 0.0740     | 0.0792                |
| H    | 0.0585    | 0.0500     | 0.0143                |

**Table S6.** Standard deviation of charges on C, O, N, H atoms of the amide group in formamide ( $S_{rel}$  optimization) and in current force fields. The standard deviation for Amber ff03 is over the amides in different residues (which have different charges), while the standard deviation over multiple force fields is computed from the Alanine amide charges in Amber ff03, Amber ff94, OPLS/AA-L, CHARMM22, GROMOS G43a1 and GROMOS G53a5.

## Cyclohexane Properties

|                             | Exp.               | Drude                    | CHARMM-ADD               | ADD-INI       | ADD-OPT       |
|-----------------------------|--------------------|--------------------------|--------------------------|---------------|---------------|
| Monomer                     |                    |                          |                          |               |               |
| $E_{rel}$ (chair)           | 0.00 <sup>a</sup>  | 0.00                     | 0.00                     | 0.00          | 0.00          |
| $E_{rel}$ (twist-boat)      | 6.60 <sup>a</sup>  | 6.06                     | 6.18                     | 6.02          | 6.01          |
| $E_{rel}$ (boat)            | 8.10 <sup>a</sup>  | 7.33                     | 7.56                     | 7.29          | 7.27          |
| Liquid                      |                    |                          |                          |               |               |
| $V_m$ (Å <sup>3</sup> )     | 180.6 <sup>b</sup> | 182.4 ± 0.8 <sup>d</sup> | 182.7 ± 1.0 <sup>d</sup> | 182.84 ± 0.42 | 182.57 ± 0.23 |
| $\Delta H_{vap}$ (kcal/mol) | 7.89 <sup>b</sup>  | 7.67 ± 0.04 <sup>d</sup> | 7.66 ± 0.05 <sup>d</sup> | 7.66 ± 0.02   | 7.69 ± 0.01   |
| E                           | 2.02 <sup>b</sup>  | 1.66 ± 0.00              | 1.02 ± 0.00              | 1.00 ± 0.01   | 1.00 ± 0.01   |
| Aqueous Solution            |                    |                          |                          |               |               |
| $G_{hyd}$ (kcal/mol)        | 1.23 <sup>c</sup>  | 1.02 ± 0.24              | 1.28 ± 0.08              | 1.48 ± 0.18   | 1.47 ± 0.19   |

**Table S7.** Cyclohexane properties calculated using polarizable and initial and optimized additive models. Results obtained with the additive CHARMM force field are included for comparison. Properties in aqueous solution are calculated using the SWM4-NDP water model with polarizable acetamide; the TIP3P water model with CHARMM, and the SWM4A-OPT water model with ADD-INI and ADD-OPT cyclohexane. <sup>a</sup> Experimental data from Ref. 4 <sup>b</sup> Experimental data from Ref. 5. <sup>c</sup> Experimental datum from Ref. 6. <sup>d</sup> Simulation data from Ref. 3.

## References

- (1) Lamoureux, G.; Harder, E.; Vorobyov, I. V.; Roux, B.; MacKerell, A. D. J. *Chem. Phys. Lett.* **2006**, *418*, 245-249.
- (2) Harder, E.; Anisimov, V. M.; Whitfield, T. W.; Mackerell, A. D., Jr.; Roux, B. *J. Phys. Chem. B* **2008**, *112*, 3509-3521.
- (3) Vorobyov, I. V.; Anisimov, V. M.; Greene, S.; Venable, R. M.; Moser, A.; Pastor, R. W.; Mackerell, A. D., Jr. *J. Chem. Theory Comput.* **2007**, *3*, 1120-1133.
- (4) Riehn, C.; Matylitsky, V. V.; Jarzeba, W.; Brutschy, B.; Tarakeshwar, P.; Kim, K. S. *J. Am. Chem. Soc.* **2003**, *125*, 16455-16462.
- (5) *CRC Handbook of Chemistry and Physics*; 84th ed.; Lide, D., Ed.; CRC Press Boca Raton, 2003.
- (6) Kelly, C. P.; Cramer, C. J.; Truhlar, D. J. *J. Chem. Theory Comput.* **2005**, *1*, 1133-1152.
